# Supplementary material
Source: MDPI journal article supplement (https://www.mdpi.com/1999-4907/14/9/1898)
Supplement: s1 [file s1]

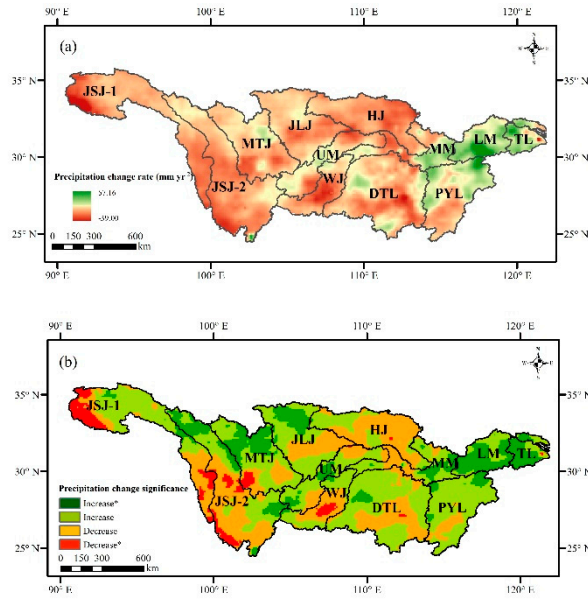

**Figure S1.** The spatial–temporal changes of precipitation change rates (a) and significances (b) in the YRB.

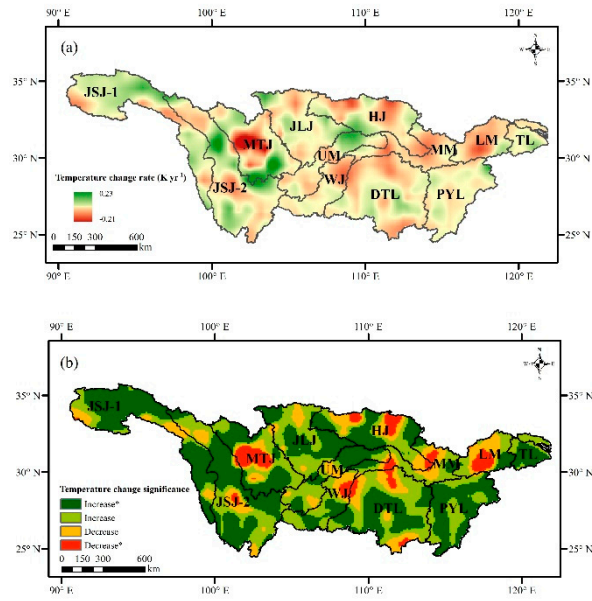

**Figure S2.** The spatial–temporal changes of temperature change rates (a) and significances (b) in the YRB.

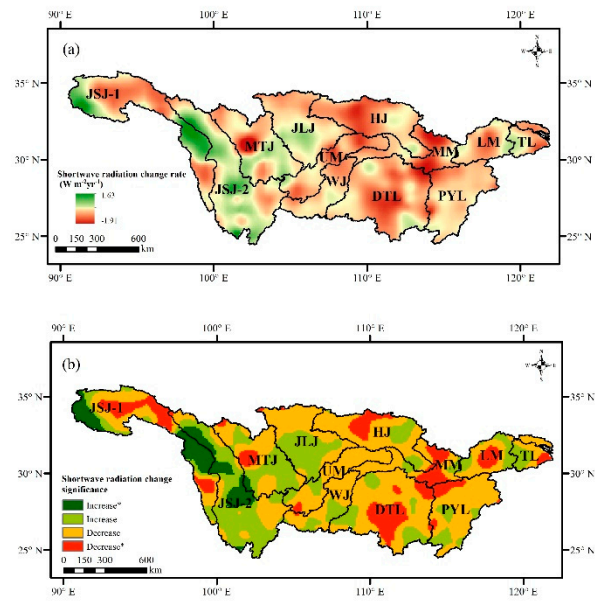

**Figure S3.** The spatial–temporal changes of shortwave radiation change rates (a) and significances (b) in the YRB.
