# Supplementary material
Source: MDPI journal article supplement (https://www.mdpi.com/1999-4907/14/9/1898)
Supplement: s1 [file s1]

Archive with 1 entries (1 files):
- forests-2581677-supplementary.pdf
